# Supplementary material
Source: PubMed Central journal article supplement (PMC4574249)
Supplement: 10.1534_115.178905_genetics.115.178905-1.pdf [file 10.1534_115.178905_genetics.115.178905-1.pdf]

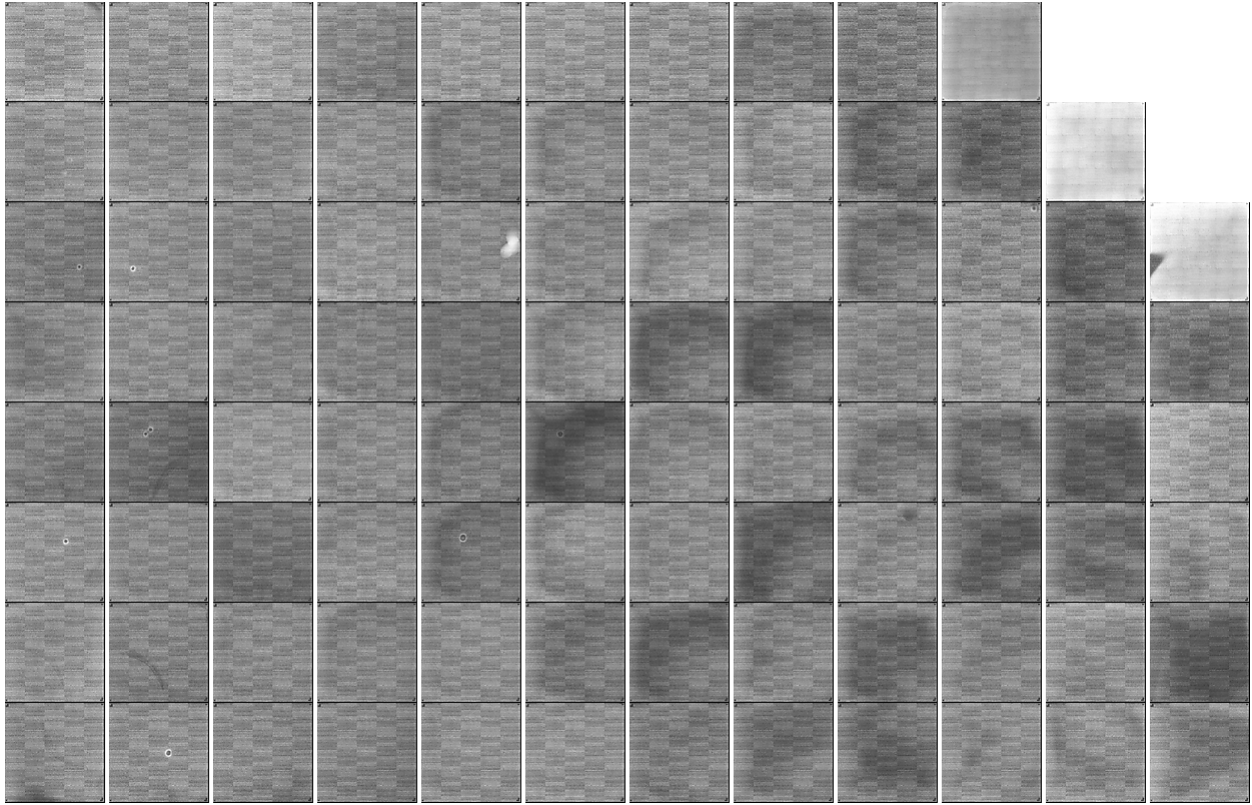

Figure S3. A montage of digital array images for an early Axiom plate assay. Note the problem in the upper right, due to an assay problem. Fast detection of such problems allowed us to fix them in a timely manner and avoid the problems in later plate assays.
