# Supplementary material
Source: PubMed Central journal article supplement (PMC4574249)
Supplement: 10.1534_115.178905_genetics.115.178905-6.pdf [file 10.1534_115.178905_genetics.115.178905-6.pdf]

### SNP KG\_10\_100076150\_f: contrast vs strength

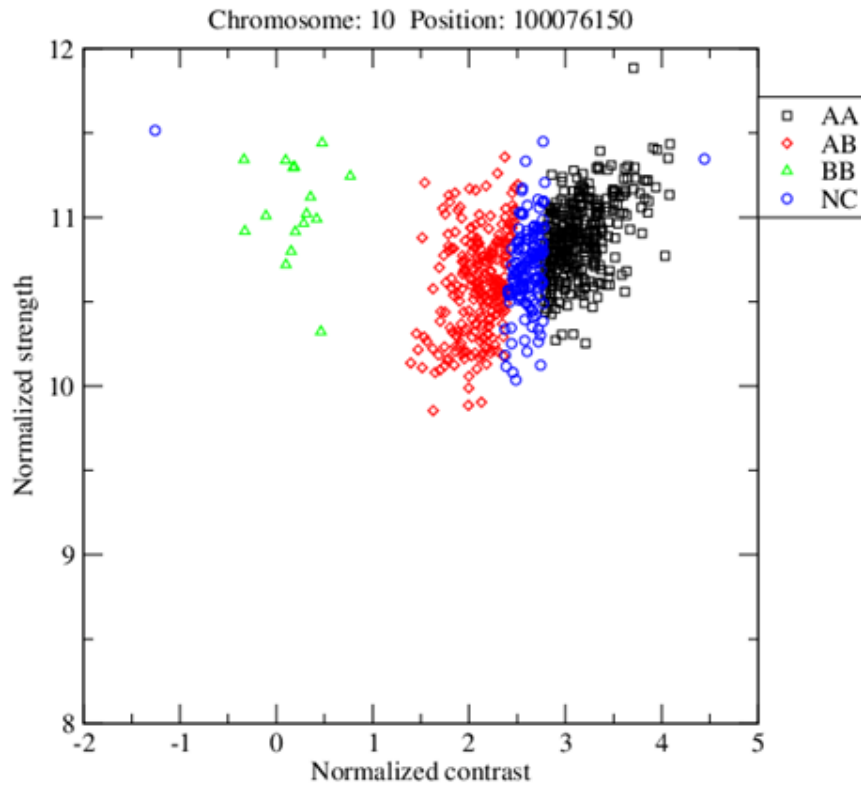

Figure S13. A normalized log intensity plot showing an example of a cluster split of a dominant AA cluster into incorrect AA and AB clusters. The cluster split also forces the miscall of the AB cluster as an incorrect BB cluster.
