# Supplementary material
Source: PubMed Central journal article supplement (PMC4574249)
Supplement: 10.1534_115.178905_genetics.115.178905-7.pdf [file 10.1534_115.178905_genetics.115.178905-7.pdf]

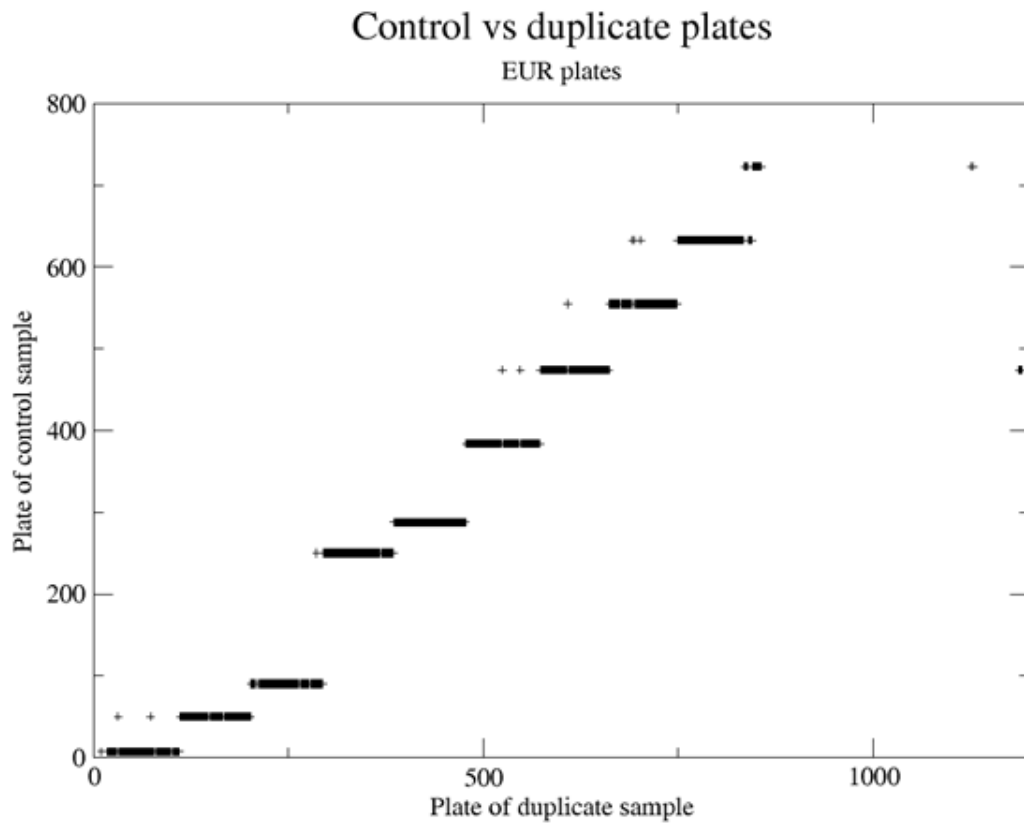

Figure S4. The distribution of Axiom plate numbers (up to plate 730) of duplicate control sample versus original control sample.
