# Supplementary material
Source: PubMed Central journal article supplement (PMC4574249)
Supplement: 10.1534_115.178905_genetics.115.178905-13.pdf [file 10.1534_115.178905_genetics.115.178905-13.pdf]

### SNP KG\_10\_100076150\_f: contrast vs strength

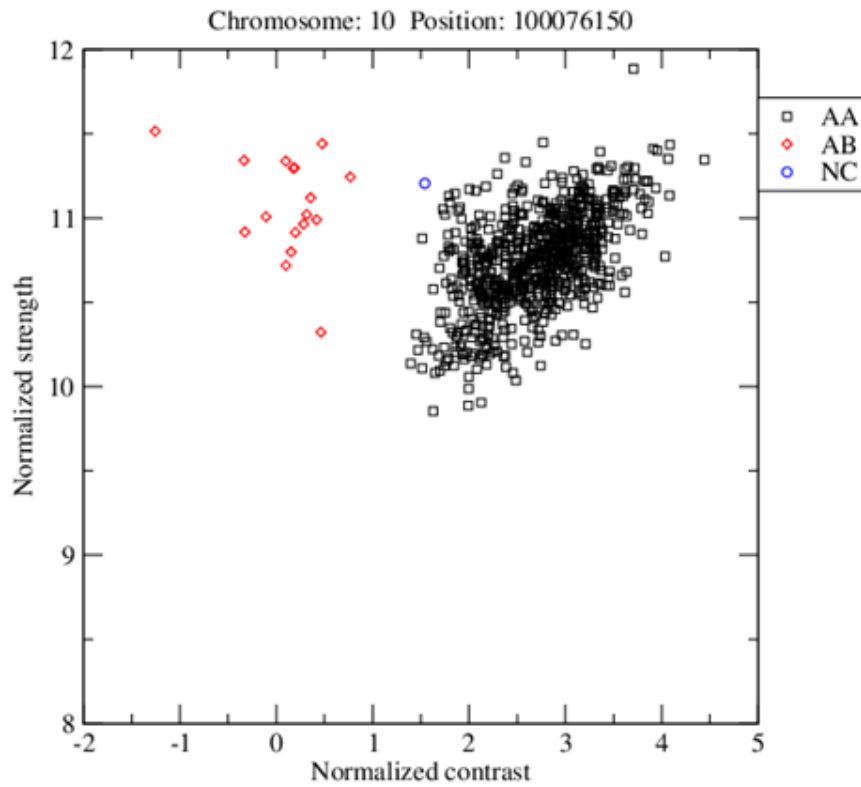

Figure S14. The same probe set as in Figure S13 but with the APT CSepPen parameter set at 0.15 instead of 0.10. The altered parameter avoids a cluster split and yields more accurate AA and AB clusters.
