# Supplementary material
Source: PubMed Central journal article supplement (PMC4574249)
Supplement: 10.1534_115.178905_genetics.115.178905-14.pdf [file 10.1534_115.178905_genetics.115.178905-14.pdf]

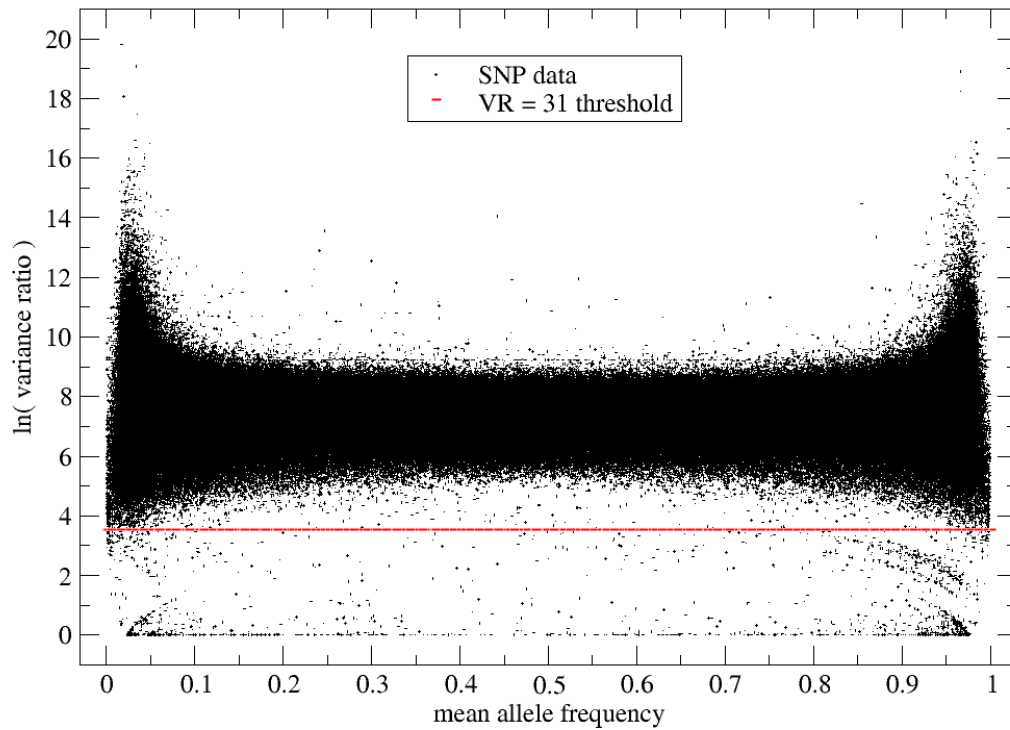

Figure S5. A scatterplot of the natural log of the variance ratio (VR) versus mean allele frequency for each SNP in the EUR dataset. The chosen variance ratio threshold of 31 is shown in red.
