# Supplementary material
Source: PubMed Central journal article supplement (PMC4574249)

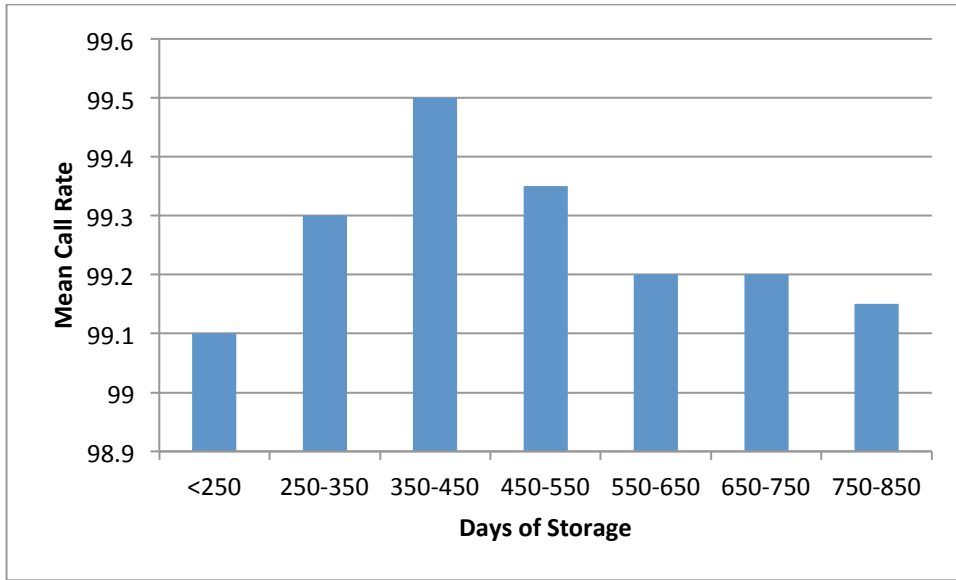

Figure S9. Mean initial call rate (CR1) by saliva sample storage time, in 100 day intervals

Supplement: 10.1534_115.178905_genetics.115.178905-10.pdf [file 10.1534_115.178905_genetics.115.178905-10.pdf]

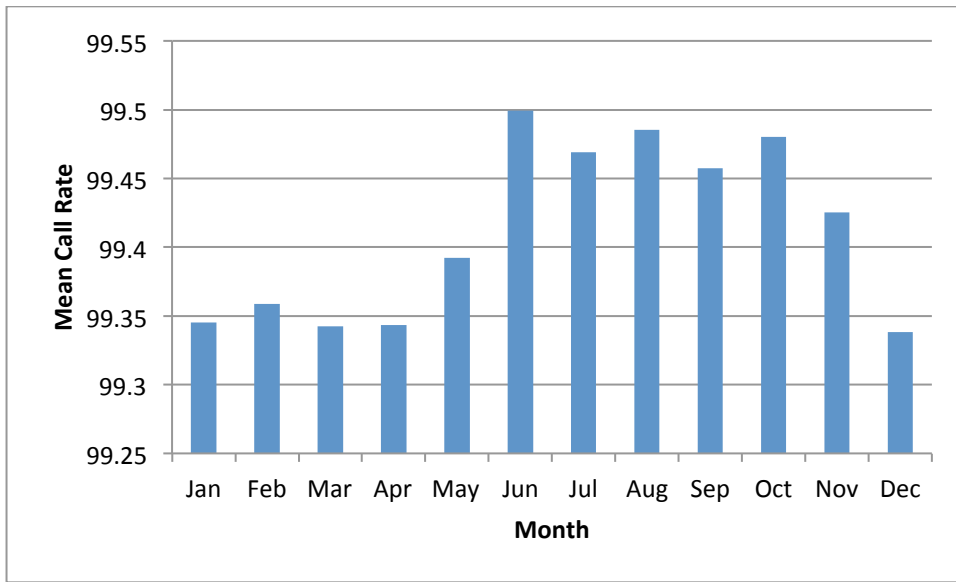

Figure S7. Mean initial call rate (CR1) by month of the year

Supplement: 10.1534_115.178905_genetics.115.178905-11.pdf [file 10.1534_115.178905_genetics.115.178905-11.pdf]

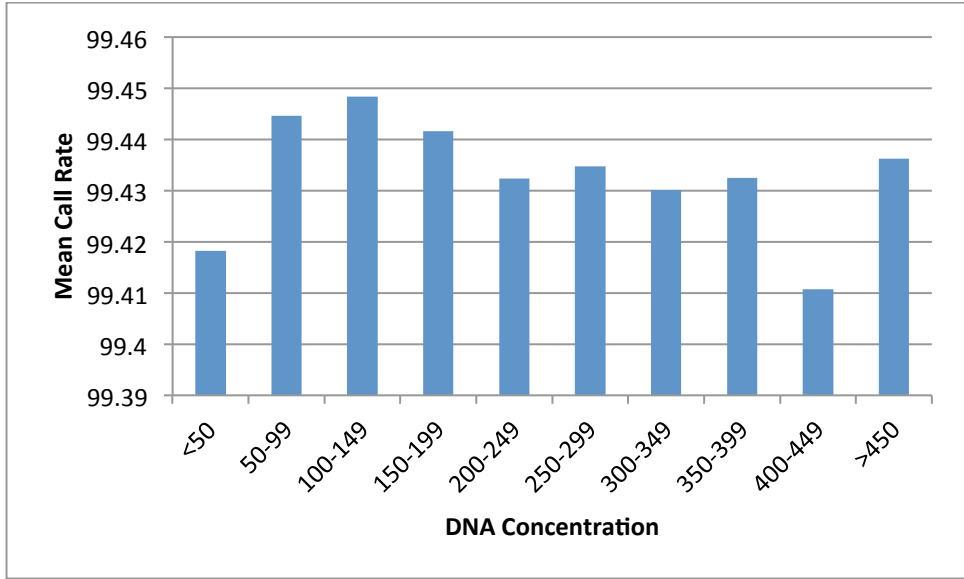

Figure S12. Mean initial call rate (CR1) by DNA concentration.

Supplement: 10.1534_115.178905_genetics.115.178905-15.pdf [file 10.1534_115.178905_genetics.115.178905-15.pdf]

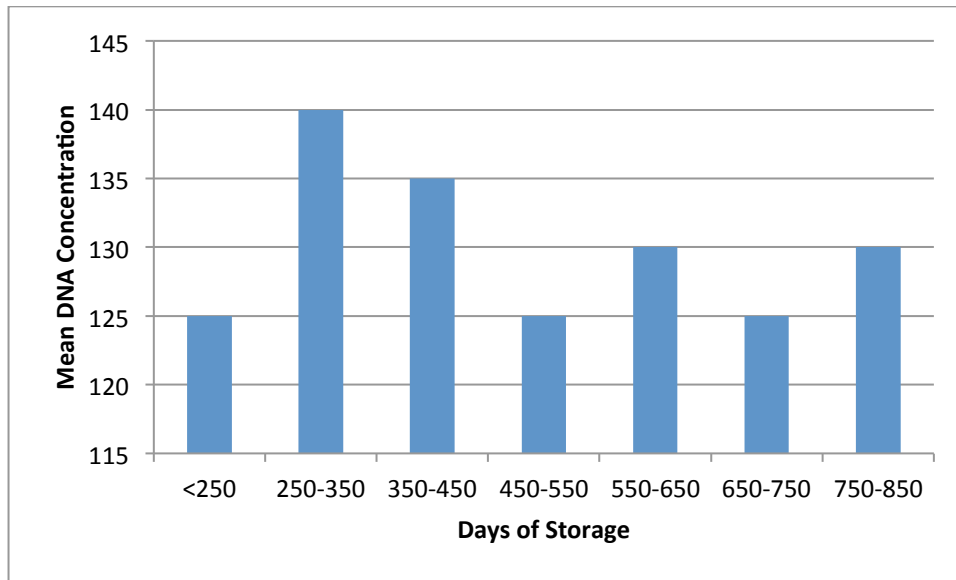

Figure S8. Mean DNA concentration by saliva sample storage time, in 100 day intervals

Supplement: 10.1534_115.178905_genetics.115.178905-2.pdf [file 10.1534_115.178905_genetics.115.178905-2.pdf]

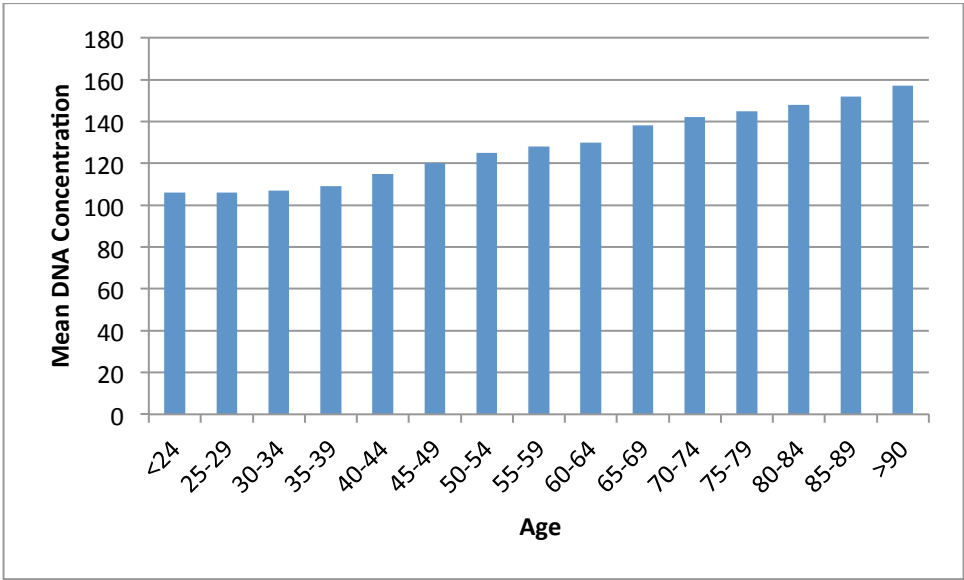

Figure S10. Mean DNA concentration by age of study subject

Supplement: 10.1534_115.178905_genetics.115.178905-3.pdf [file 10.1534_115.178905_genetics.115.178905-3.pdf]

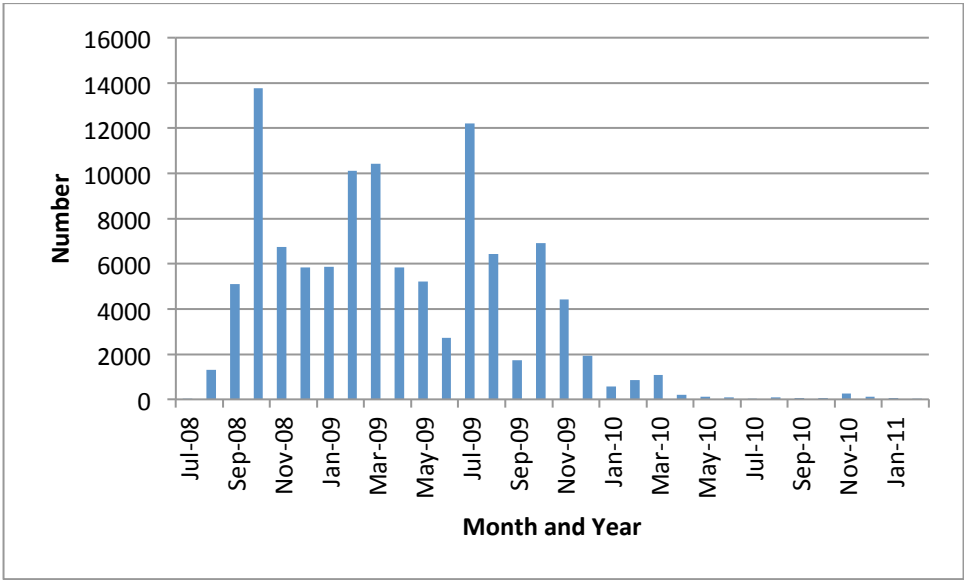

Figure S1. Distribution of GERA saliva sample collection dates, by month and year

Supplement: 10.1534_115.178905_genetics.115.178905-4.pdf [file 10.1534_115.178905_genetics.115.178905-4.pdf]

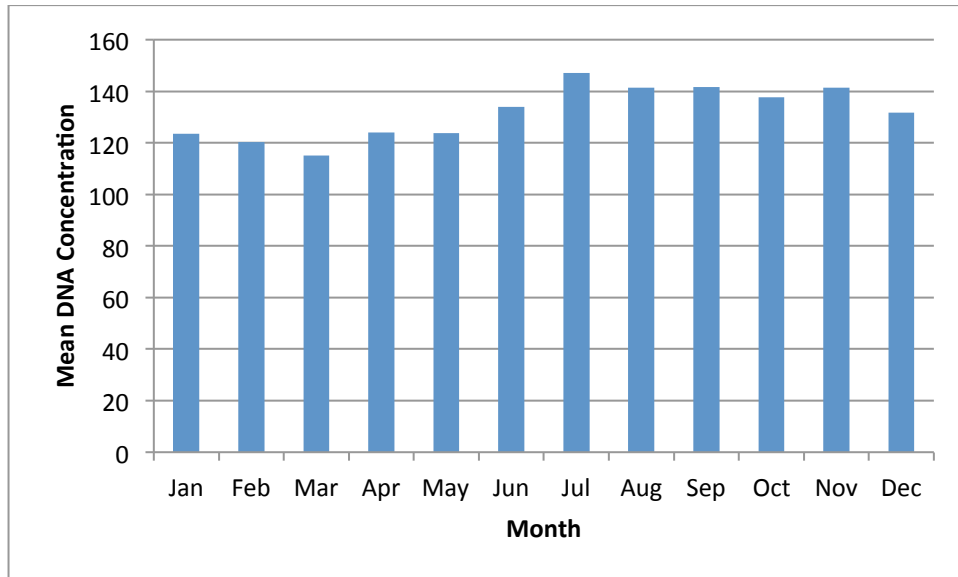

Figure S6. Mean DNA concentration by month of the year

Supplement: 10.1534_115.178905_genetics.115.178905-5.pdf [file 10.1534_115.178905_genetics.115.178905-5.pdf]

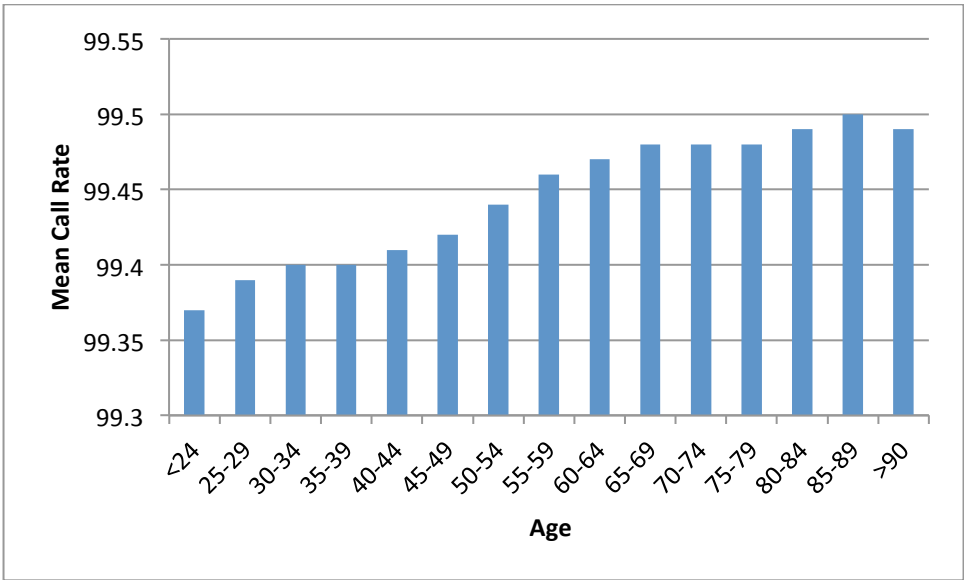

Figure S11. Mean initial call rate (CR1) by age of study subject

Supplement: 10.1534_115.178905_genetics.115.178905-8.pdf [file 10.1534_115.178905_genetics.115.178905-8.pdf]

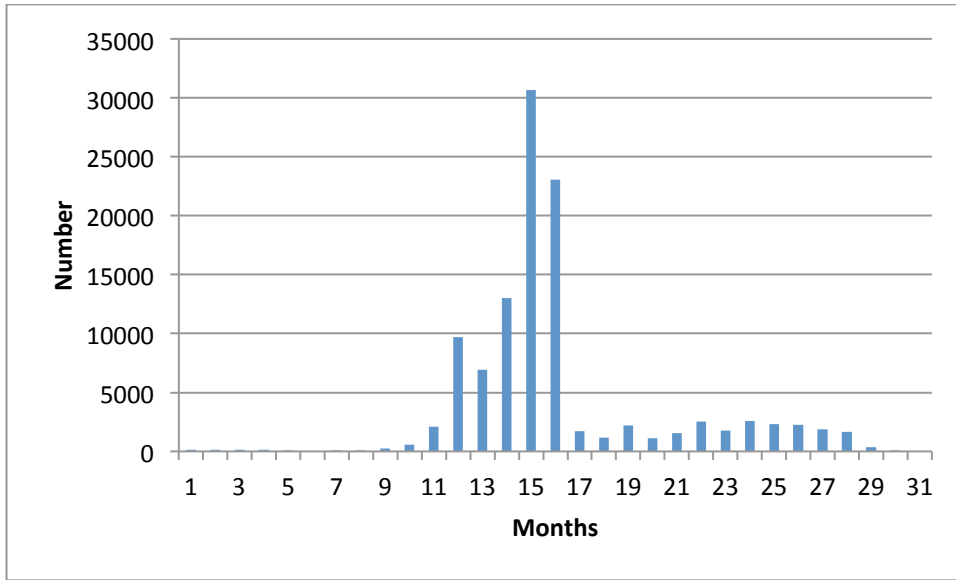

Figure S2. Distribution of saliva sample storage times prior to processing, in months

Supplement: 10.1534_115.178905_genetics.115.178905-9.pdf [file 10.1534_115.178905_genetics.115.178905-9.pdf]
